1 **Plumage redness signals mitochondrial function in the House Finch**

2

3 Geoffrey E. Hill<sup>\*†1</sup>, Wendy R. Hood<sup>†1</sup>, Zhiyuan Ge<sup>1</sup>, Rhys Grinter<sup>2</sup>, Chris Greening<sup>2</sup>, James D.  
4 Johnson<sup>1</sup>, Noel R. Park<sup>1,3</sup>, Halie A. Taylor<sup>1</sup>, Victoria A. Andreasen<sup>1</sup>, Matthew J. Powers<sup>1</sup>,  
5 Nicholas M. Justyn<sup>1</sup>, Hailey A. Parry<sup>4</sup>, Andreas N. Kavazis<sup>4</sup>, Yufeng Zhang<sup>1,5</sup>

6

7 **Affiliations:**

8 <sup>1</sup>Department of Biological Sciences, Auburn University, Auburn, Alabama 36849 USA

9 <sup>2</sup>School of Biological Sciences, Monash University, Clayton, Victoria 3800, Australia

10 <sup>3</sup>Department of Molecular Biology, Princeton University, Princeton, NJ 08544

11 <sup>4</sup>School of Kinesiology, Auburn University, Auburn, Alabama 36849 USA

12 <sup>5</sup>School of Health Studies, University of Memphis, Memphis, TN 38152

13 \*Correspondence to: [ghill@auburn.edu](mailto:ghill@auburn.edu)

14 † these authors contributed equally to this work

15

16 **Abstract**

17 Carotenoid coloration is widely recognized as a signal of individual condition in various animals,  
18 but despite decades of study, the mechanisms that link carotenoid coloration to condition remain  
19 unresolved. Most birds with red feathers convert yellow dietary carotenoids to red carotenoids in  
20 an oxidation process requiring the gene encoding the putative cytochrome P450 enzyme  
21 CYP2J19. Here, we tested the hypothesis that the process of carotenoid oxidation and feather  
22 pigmentation is functionally linked to mitochondrial performance. Consistent with this  
23 hypothesis, we observed high levels of red ketolated carotenoids associated with the hepatic  
24 mitochondria of molting wild house finches (*Haemorhous mexicanus*), and upon fractionation,  
25 we found the highest concentration of ketolated carotenoids in the inner mitochondrial  
26 membrane. We further found that the redness of growing feathers was positively related to the  
27 performance of liver mitochondria. Structural modeling of CYP2J19 supports a direct role of this  
28 protein in carotenoid ketolation that may be functionally linked to cellular respiration. These  
29 observations suggest that feather coloration serves as a signal of core functionality through  
30 inexorable links to cellular respiration in the mitochondria.

31

32 Carotenoid coloration | OXPHOS | mate choice | sexual selection

33 **Short Title:** Mitochondrial bioenergetics and plumage color

34

## 35 **1. Introduction**

36 Carotenoids are responsible for the bright red, orange, and yellow coloration of many  
37 animal species, and this coloration serves as an important social signal of individual condition  
38 [1,2]. In many vertebrate species, individuals that display red-shifted coloration gain a mating  
39 advantage or hold more resources [3,4], and carotenoid coloration is among the most commonly  
40 cited example of a condition-dependent sexual ornament [5–7]. Compared to animals with less  
41 red ornamentation, individuals with redder ornaments are better at resisting and recovering from  
42 parasites and managing oxidative stress, among other measures of performance [8–11].

43 Despite decades of study, however, the mechanisms that link red carotenoid pigmentation  
44 to individual performance remain uncertain [12–15]. Hypotheses for how carotenoid coloration  
45 serves as a signal of individual condition have traditionally focused on resource limitations or the  
46 need to trade carotenoid usage to support physiological functions over ornamentation [16,17],  
47 but empirical support for both of these ideas is equivocal [12,18]. More recently, it has been  
48 proposed that coloration is controlled by metabolic function and in turn mitochondrial efficiency  
49 [9,19]. In support of this idea, a recent meta-analysis revealed that the link between color  
50 expression and individual condition is strongest in bird species that rely on the metabolic  
51 conversion of carotenoids for color displays [7]. Such carotenoid conversions are most relevant  
52 to red color displays because most animals that display red carotenoid coloration ingest only  
53 yellow carotenoids that they oxidize to red pigments in a process that is hypothesized to take  
54 place in mitochondria [19,20]. In this regard, it was recently shown that genes encoding proteins  
55 from the cytochrome P450 monooxygenase superfamily are required for the production of red  
56 ornamental carotenoids in birds [21–23].

57           In this study, we explored the hypothesis that red carotenoid coloration serves as a signal  
58 of mitochondrial performance. To do so, we compared the relationships between carotenoid  
59 coloration and mitochondrial performance in male house finches (*Haemorrhous mexicanus*) that  
60 were actively producing ornamental feather coloration (figure 1). To produce red feather  
61 coloration used to attract females, house finches oxidize the yellow dietary carotenoid  
62 cryptoxanthin to the red pigment 3-hydroxyechinenone (3EH) in a process requiring the gene  
63 encoding the cytochrome P450 monooxygenase CYP2J19 [21,24]. Our central hypothesis is that  
64 the efficiency of the oxidation of yellow dietary pigments, and hence the coloration of feathers,  
65 is controlled either directly or indirectly by mitochondrial function (figure 2) [19,25]. To test this  
66 hypothesis, we performed a fractionation study to confirm the localization of red carotenoids in  
67 hepatic mitochondria. We subsequently compared several measures of mitochondrial  
68 performance in hepatic tissue of wild birds with different hues. Finally, we used this information,  
69 in conjunction with a molecular model of CYP2J19, to propose a hypothesis for how  
70 mitochondrial function may control carotenoid conversion.

71

## 72   **2.    Materials and Methods**

### 73       **(a) Field Collection**

74           All procedures in this study were approved by the Auburn University Institutional  
75 Animal Care and Use Committee (PRN 2016-2922) and under federal (MB784373-0) and  
76 Alabama (6285940) collecting permits. We captured wild house finches at feeding stations using  
77 a walk-in basket trap as described in Hill [26]. All birds included in this study were males in the  
78 hatching year, transitioning from juvenal to first basic plumage via prebasic molt. In the juvenal  
79 plumage, house finches have no feathers with carotenoid pigmentation, so any red, orange, or

80 yellow feathers in the breast plumage of birds had recently been grown. It was crucial to use  
81 birds in the process of molt and hence actively engaged in the production of red feather  
82 pigments, because this approach allowed us to match the current physiological state of birds to  
83 ornamentation that was actively being produced.

84 We captured birds at seven locations in Lee County, Alabama using large basket traps in  
85 which we suspended a tube feeder. Birds were captured between 07:00 and 10:00 on 11  
86 mornings from July 20 to August 20, 2017 and 17 mornings from July 20 to August 17, 2018.  
87 Our protocol was to rapidly approach a trap holding birds—finches are undisturbed in these large  
88 traps until approached— and then to quickly move the birds from trap to brown paper bags.  
89 Paper bags enable birds to stand in a less stressful position and block all threatening visual and  
90 most auditory stimulation [26]. Thus, birds remained relatively calm between the time of capture  
91 and a maximum of three hours later when we removed them from the bag. Birds were taken from  
92 the bags, immediately anesthetized with isoflurane vapors and then sacrificed to collect tissues  
93 for physiological analyses.

94

#### 95 **(b) Color analysis**

96 The coloration of growing breast feathers was quantified from digital images of the  
97 ventral plumage of carcasses that were taken under standardized lighting with a color standard in  
98 each image. We quantified color from digital images instead of directly from feathers using a  
99 spectrometer because some birds used in this study had grown only scattered colored feathers.  
100 The human eye could see the color of incoming feathers and digital camera images captured the  
101 coloration, but there were no colored regions large enough to allow for accurate measurement  
102 with a spectrometer. Color quantification from digital images is reliable and repeatable [27,28].

103           We used Adobe Photoshop to first standardize all images to color standards within each  
104 image and then used the color sampler tool (Adobe Photoshop CS3 extended, v. 10.0, Adobe  
105 Systems, San Jose, CA, USA) to quantify the hue and saturation of feathers with carotenoid  
106 pigmentation at three points in each photo. Molting birds have uneven coloration and we focused  
107 color quantification on the largest unbroken patches of red/orange/yellow coloration where  
108 feathers were positioned to create a plane of coloration relative to the camera angle. Color  
109 patches were preselected before moving the selection wand over them and then the wand was  
110 moved to the center of the chosen patch and hue and saturation recorded. The PI who made the  
111 color measurements was not blind to the hypotheses being tested but was blind to the  
112 physiological measures for the birds being assessed; hence subconscious bias toward the  
113 hypothesis could not have affected the measurements of color. We averaged the three color  
114 measurements to arrive at a single hue value for each bird.

115

### 116           **(c) Tissue collection**

117           A total of 91 birds were used in the study. We conducted fractionation of homogenized  
118 liver tissue using 55 of these birds. Fractionation of mitochondria required seven or eight times  
119 the tissue mass of the average mass of a House Finch liver. Thus, the livers of seven or eight  
120 males were pooled for each fractionation analyses. We pooled all hatching year, molting males  
121 captured in a particular day; hence, whether birds were added to a pool was not related to  
122 coloration or other variables. We used seven birds to create a single pool during the molt window  
123 of August 2017, and we used 48 birds each to create six pools, each composed of 8 birds, in the  
124 summer of 2018. We increased the number of individuals pooled between years because seven  
125 males used in 2017 provided barely enough tissue. A small cube of the right lobe of the liver was

126 removed from 36 additional birds (collected in July-August 2017), flash frozen in liquid  
127 nitrogen, and then stored at -80°C for later analyses. The left and remaining right lobe of the liver  
128 from these birds was used for mitochondrial isolation and immediate testing of mitochondrial  
129 respiration.

130

#### 131 **(d) Fractionation of mitochondria**

132 Within 20 s of dissection from carcasses, livers were rinsed and minced together in  
133 SMEE (10 mM sucrose, 250 mM MOPS, 1 mM EDTA, and 1 mM EGTA) isolation buffer.  
134 During the entire procedure, all liver mitochondria preparations were kept at 4°C. Minced livers  
135 were then homogenized with a 2 mL glass Teflon homogenizer at 300 mg tissue per milliliter of  
136 buffer. Following the protocol of Trounce et al [29], as modified by Ingraham et al [29], the  
137 homogenate was centrifuged at 750 g for 10 min. The supernatant was then centrifuged at  
138 9,800 g for 15 min. The resulting supernatant was saved for further separation into cytosol and  
139 microsome fractions (labeled ER-1). The microsome fraction was comprised primarily of  
140 fragments of endoplasmic reticulum (ER). The pellet was resuspended slowly by drop-wise  
141 addition of SMEE. This suspension was then centrifuged again at 9,800 g for 10 min. The pellet  
142 was resuspended in SMEE buffer and layered on top of 30% Percoll SMEE solution and  
143 subjected to ultracentrifugation at 150,000 g for 60 min along with the supernatant ER-1 from  
144 the 9,800 g spin containing cytosol and microsomes. The mitochondrial-rich layer from the  
145 Percoll solution was carefully harvested and washed 3 times with centrifugation at 7000 g for 10  
146 min in SMEE at 4°C. The supernatant from ER-1 was saved as cytosol, and the pellet as  
147 microsome fraction.

148 For sub-mitochondrial fractionation, we followed a method previously described by  
149 Palczewski et al [30], with slight modification. Isolated mitochondria were diluted with SMEE to  
150 a minimum concentration of 50 mg mitochondrial protein/ml. Digitonin was added to a final  
151 concentration of 0.12 mg/mg protein. The solution was stirred on ice for 2 min and then diluted  
152 with 1.5 volume of SMEE. The solution was then centrifuged at 12,000 g for 10 min. The  
153 supernatant, which contained the outer mitochondrial membrane, was saved. The pellet, which  
154 contained mitoplast fraction, was resuspended in SMEE and then sonicated in an ice bath for 30  
155 s (4 s on, 10 s off cycles). The sonicated material, as well as the previously saved supernatant,  
156 were then ultracentrifuged at 150,000 g for 60 min at 4°C.

157 We predicted that the ultracentrifuged pellet from the mitoplast fraction contained the  
158 inner mitochondrial membrane, while the supernatant from the same fraction contained the  
159 matrix. With this method, however, instead of having only inner mitochondrial membrane, the  
160 pellet should be considered a mixture of mostly inner mitochondrial membrane and some matrix  
161 content. The pellet from digitonin-treated supernatant contained outer mitochondrial membrane.  
162 Using the cubes of the liver frozen previously, fractions were then verified by immunoblot  
163 against subunits of carnitine palmitoyltransferase 1A (CPT1A), citrate synthase (CS) and  
164 cytochrome *c* oxidase (COX IV). In addition to detecting ketolated carotenoids in the inner  
165 mitochondrial membrane (IMM) and to lesser extent, the outer mitochondrial membrane  
166 (OMM), we also detected ketolated carotenoids in layer ER-1 (= 3.41+1.38 SD  $\mu\text{g mL}^{-1}$  3HE).  
167 This fraction is predicted to represent the endoplasmic reticulum-rich microsome. We did not  
168 confirm the identity of this layer with a protein marker so we cannot be confident in its identity.  
169 Observing ketolated carotenoids in a microsome layer would be expected if carotenoids are



170 ketolated in or transported to the IMM because once ketolated, the pigments must be packaged  
171 for transport out of hepatic cells following ketolation.

172

### 173 **(e) Mitochondria measurements**

174 Mitochondria were isolated following procedures outlined previously [31]. The fresh  
175 liver was minced and then homogenized in a Potter-Elvehjem PTFE pestle and glass tube. The  
176 resulting homogenate was centrifuged at 500 g for 10 minutes and the supernatant was then  
177 decanted through cheesecloth and centrifuged at 3,500 g for 10 minutes. The resulting  
178 supernatant was discarded, and the mitochondria pellet was washed in liver isolation solution  
179 twice with centrifugation at 3,500 g for 10 minutes. The final mitochondria pellet was suspended  
180 in a mannitol-sucrose solution.

181 Mitochondrial respiration was determined polarographically (Oxytherm, Hansatech  
182 Instruments, UK) following procedures outlined previously [31]. In one chamber, respiration was  
183 measured using 2 mM pyruvate, 2 mM malate, and 10 mM glutamate as a substrate. In the  
184 second chamber, respiration was measured using 5 mM succinate as a substrate. State 2  
185 respiration was defined as the respiration rate in the presence of substrates, and state 3  
186 respiration, a measure of maximal respiration, was defined as the rate of respiration following the  
187 addition of 0.25 mM ADP to the chamber containing buffered mitochondria and respiratory  
188 substrates, and state 4 respiration was defined as the respiration rate measured after the  
189 phosphorylation of added ADP was complete. State 2, 3, and 4 respirations were measured at  
190 40°C and were normalized to mitochondrial protein content. The respiratory control ratio (RCR)  
191 was calculated by dividing state 3 respiration by state 4 respiration.

192 Mitochondrial membrane potential was measured as described by [32]. Briefly,  
193 mitochondrial membrane potential was followed using the potential-sensitive dye safranin O  
194 [33]. Isolated mitochondria were incubated in standard buffer containing 3 mM HEPES, 1 mM  
195 EGTA, 0.3% (W/V) BSA, 1  $\mu\text{g/ml}$  oligomycin, and 120 mM potassium chloride (pH = 7.2 and  
196 40°C). Mitochondria were incubated at a concentration of 0.35 mg/ml mitochondrial protein in  
197 standard buffer with 5  $\mu\text{M}$  safranin O. The change in fluorescence were measured in cuvette by  
198 Spectramax M (Molecular Devices, Sunnyvale, CA) at an excitation of 533 nm and an emission  
199 of 576 nm. In the end of each run, membrane potential was dissipated by addition of 2  $\mu\text{M}$   
200 FCCP. The relative decrease in fluorescent signal on energization of the mitochondria is used to  
201 represent the membrane potential. Results are reported as the absolute magnitude of this change  
202 in fluorescence, with larger changes in relative fluorescence units indicating higher membrane  
203 potentials.

204 The measurement of  $\text{H}_2\text{O}_2$  emission in isolated mitochondria was conducted using  
205 Amplex Red (ThermoFisher, Waltham, MA) [31]. Formation of resorufin (Amplex Red  
206 oxidation) by  $\text{H}_2\text{O}_2$  was measured at an excitation wavelength of 545 nm and an emission  
207 wavelength of 590 nm using a Synergy H1 Hybrid plate reader (BioTek; Winooski, VT, USA),  
208 at 40°C in a 96-well plate using succinate. To eliminate carboxylesterase interference, 100  $\mu\text{M}$  of  
209 phenylmethyl sulfonyl fluoride were added into experimental medium immediately prior  
210 measurement according to Miwa et al [34]. Readings of resorufin formation were recorded every  
211 5 minutes for 15 minutes, and a slope (rate of formation) was produced from these. The obtained  
212 slope was then converted into the rate of  $\text{H}_2\text{O}_2$  production using a standard curve and were  
213 normalized to mitochondrial protein levels. Citrate synthase activities was measured in liver

214 homogenate as a function of the increase in absorbance from 5,5'-dithiobis-2-nitrobenzoic acid  
215 reduction according to Trounce et al [29].

216 Western blots were conducted on liver samples to analyze a marker of lipid peroxidation  
217 (4-Hydroxynonenal; 4-HNE; ab46545; Abcam, Cambridge, MA), a marker of protein oxidation  
218 (protein carbonyls; OxyBlot; s7150; EMD Millipore, Billerica, MA), and a marker of  
219 mitochondrial biogenesis (PGC-1 $\alpha$ , GTX37356; Genetex, Irvine, CA). Each membrane was  
220 stained by Ponceau S and was used as the loading and transfer control. A chemiluminescent  
221 system was used to visualize marked proteins (GE Healthcare Life Sciences, Pittsburgh, PA).  
222 Images were taken and analyzed with the ChemiDocIt Imaging System (UVP, LLC, Upland,  
223 CA).

224

#### 225 **(f) Analyses of tissue carotenoid content**

226 We used high performance liquid chromatography (HPLC) to examine the carotenoid  
227 content of mitochondrial fractions proposed to be inner mitochondrial membrane, outer  
228 mitochondrial membrane, and matrix. The pelleted fractions were resuspended in 0.5 ml  
229 mitochondrial extraction buffer, and we subsampled 50  $\mu$ l of the resuspension and extracted with  
230 250  $\mu$ l of ethanol, 500  $\mu$ l water, and 1.5 ml of hexane:tert-Butyl ethyl ether 1:1 vol:vol. We  
231 collected the organic phase from the samples, dried this under a stream of nitrogen gas, then  
232 resuspended in 200  $\mu$ l of mobile phase. We injected 50  $\mu$ l of the resuspended extract in to an  
233 Agilent 1100 series HPLC equipped with a YMC carotenoid 5.0  $\mu$ m column (4.6 mm  $\times$  250 mm,  
234 YMC). We eluted the samples with a gradient mobile phase consisting of  
235 acetonitrile:methanol:dichloromethane (44:44:12) (vol:vol:vol) through 11 minutes then a ramp  
236 up to acetonitrile:methanol:dichloromethane (35:35:30) from 11-21 minutes followed by

237 isocratic conditions through 35 minutes. The column was held at 30°C, and the flow rate was 1.2  
238 ml/min throughout the run. We monitored the samples with a photodiode array detector at 400,  
239 445, and 480 nm, and carotenoids were identified by comparison to authentic standards or  
240 published accounts. Carotenoid concentrations were determined based on standard curves  
241 established with astaxanthin (for ketocarotenoids) and zeaxanthin (for xanthophylls) standards.

242

### 243 **(g) Statistical analyses**

244 Statistical analyses were completed with SigmaStat 3.5, Systat Software, Inc., Point  
245 Richmond, CA, USA (fraction data), SAS 9.4, SAS Institute Inc, Cary, NC, USA, and R version  
246 3.3.2, Vienna, Austria [35]. Analysis of variance was used to compare the relative concentration  
247 of mitochondrial membrane and matrix markers, and ketolated carotenoids between  
248 mitochondrial fractions. To compare the hue of the house finches to mitochondrial variables, we  
249 used a multivariate statistical model because the mitochondrial performance variables are  
250 dependent on one another. We used backward stepwise selection procedure for multiple  
251 regression to evaluate this relationship. For all analyses, significance was established at  $p < 0.05$ .  
252 The stepwise model was run in SAS and the model estimated coefficients from our final model  
253 were double-checked in R. In addition, we ran linear regression between variables in SAS to  
254 confirm biologically relevant relationships.

255

### 256 **(h) CYP2J19 molecular modeling**

257 The amino acid sequence from House Finch CYP2J19 was submitted to the Robetta and  
258 I-TASSER servers for prediction of the protein's 3D structure based on a combined *ab initio* and

259 homology modeling approach [36,37]. The highest ranked output model from each server was  
260 utilized for analysis and cross examined for consistency with the other models.

261         The position of the predicted heme functional group of CYP2J19 was modeled through  
262 superimposition with the structure of the nearest structurally characterized homologue (CYP2B4,  
263 PDB ID = 3TK3). The position of this heme group is consistent with coordination by cysteine  
264 444 of CYP2J19. Potential substrate tunnels were identified using Caver 3.0 [38], with the Fe  
265 atom of the heme functional group set as the starting point for the search starting point. A  
266 minimum probe radius of 0.9 Å, a shell depth of 4, a shell radius of 3 and a clustering depth of  
267 3.5 was utilized. Identified tunnels were screened manually for likely involvement in substrate  
268 capture, based on size and proximity of the tunnel exit to the putative lipid embedded portion of  
269 CYP2J19. To validate the selected substrate tunnel, its position was compared to ligands in  
270 previous solved cytochrome P450 structures (PDB codes utilized: 4H1N, 3C6G, 4UFG, 3EBS,  
271 1R90, 4I8V, 5X24, 4R20, 5T6Q, 3UA1, 2Q9F, 1ZOA, 4KEY, 2UWH and 4KPA). P450s bound  
272 to compact ligands accommodated them in a distinct region below the heme ligand, while  
273 elongated substrates clustered on the opposite side. The substrate tunnel predicted in CYP2J19  
274 corresponded to the position of these larger substrates, which is consistent with the elongated  
275 nature of the carotenoid substrates.

276         In order to determine the likelihood that the N-terminus of CYP2J19 forms a lipid  
277 anchor, we analyzed the primary amino acid sequence and found that, typical of lipid anchors  
278 and secretion signal peptides, the first 45 amino acids are composed of predominantly  
279 hydrophobic residues. Both modelling programs, as well as the secondary structure prediction  
280 program JPRED, predicted that the majority of this region is  $\alpha$ -helix in structure. This suggests

281 that the N-terminus of CYP2J19 indeed forms a lipid anchoring helix. The models and associated  
282 analysis are contained in supplemental files associated with the manuscript.

283

284

### 285 **3. Results and discussion**

286

#### 287 **(a) Red carotenoids are localized in the inner mitochondrial membrane in molting** 288 **house finches**

289 A key prediction of the hypothesis that carotenoid coloration is linked to cellular  
290 respiration is that red carotenoid pigments should be present within mitochondria [19,25]. We  
291 previously documented that high levels of red ketolated carotenoids are associated with  
292 mitochondria in the livers of molting house finches [39], but we could not rule out that these  
293 pigments were actually concentrated in external mitochondrial-associated membranes. To  
294 resolve this, we isolated and fractionated hepatic mitochondria into IMM, OMM, and matrix, and  
295 subsequently measured the concentrations of the red carotenoid 3HE in the fractions.

296 Protein markers confirmed the separation of mitochondrial components (figure 3C).  
297 Consistent with our hypothesis, 3HE was present in high concentrations in the IMM (2.19  $\mu\text{g}$   
298  $\text{mL}^{-1}$ ) (figure 3A and 3B). These levels were significantly higher than in the matrix (by 22-fold;  
299  $p = 0.009$ ) and OMM (by 7.8-fold;  $p = 0.014$ ) fractions. The high levels of 3HE in the IMM  
300 fraction of mitochondria is strong evidence that ketolated carotenoids are not merely associated  
301 with mitochondria, but instead abundant in the interior membrane. This observation is of  
302 potentially great significance for understanding the mechanisms that underlie honest signaling  
303 via red carotenoid coloration. Given carotenoids compounds are co-localized with the electron

304 transport system in the IMM, they are ideally localized within the cells of house finches to signal  
305 respiratory performance during sexual displays. These findings contrast with mammals, which  
306 do not use ketolated carotenoids in social signaling [42]; most mammals use enzymatic  
307 mechanisms to specifically exclude carotenoids from the mitochondria, including carotenoid-  
308 cleaving enzyme  $\beta,\beta$ -carotene-9,10-dioxygenase (BCO2) [41], and murine knockdowns of this  
309 gene have negative consequences for physiological function [40].

310

311 **(b) Carotenoid coloration is strongly correlated with mitochondrial function in house**  
312 **finches**

313 The second key prediction of our central hypothesis is that bird coloration is positively  
314 associated with mitochondrial bioenergetic capacity [9,25]. We tested this prediction by  
315 capturing wild house finches that were actively growing their red feathers, quantifying the  
316 coloration of growing feathers, and measuring the performance of functional hepatic  
317 mitochondria. We measured isolated liver mitochondrial state 2 (proton leak), 3, and 4  
318 respiration rates, RCR, and mitochondrial membrane potential both in the presence of OXPHOS  
319 complex I substrates (pyruvate, malate, and glutamate) and OXPHOS complex II substrate  
320 (succinate). We also quantified isolated liver mitochondrial  $H_2O_2$  production and whole liver  
321 tissue adduct levels of 4-hydroxynonenal (4-HNE; a by-product of lipid peroxidation), protein  
322 carbonyls, citrate synthase activity, and PGC-1 $\alpha$  protein levels (the mitochondrial biogenesis  
323 transcriptional activator).

324 We ran a stepwise-backwards regression model to determine which of the 15 variables  
325 made a significant contribution to the coloration of growing feathers. Six variables contributed to  
326 the best fit statistical model ( $F = 10.6$ ,  $df = 6,25$ ,  $p < 0.001$ ,  $R^2=0.727$ ); RCR, state 2 respiration,

327 state 4 respiration, and mitochondrial membrane potential with complex I substrates; 4-HNE  
328 levels and PGC-1 $\alpha$  protein levels (figure 4, table 1). The strongest associations in both the  
329 backward regression model and the full multiple regression model were between the redness of  
330 growing feathers and both RCR and PGC-1 $\alpha$  (figure 4).

331 The ten reddest birds had an average RCR 1.7-fold greater than the ten yellowest  
332 individuals ( $p < 0.001$ ). The RCR is a measure of mitochondrial coupling efficiency; low ratios  
333 are associated not only with reduced performance but also with disease and aging in birds and  
334 mammals [45,46]. RCR is a ratio of state 3 divided by state 4 respiration, thus an increase in  
335 RCR should be associated with an increase in state 3 (maximum respiratory performance), a  
336 decrease in state 4 (basal, non-phosphating, respiratory performance), or both. In this study, RCR  
337 was greater in redder birds and, counter-intuitively, state 4 respiration was also higher in redder  
338 birds than dull birds in the backward-regression, but not full model. Given the inconsistency of  
339 the full and backward regression models, we interpret the state 4 values relative to RCR with  
340 caution. A direct comparison of the linear relationship between RCR and both state 3 and state 4  
341 respiration is more revealing and clearly suggests that higher RCR is associated with lower state  
342 4 respiration (linear regression,  $F_{31}=45.8$ ,  $p<0.001$ ) but not higher state 3 respiration (linear  
343 regression,  $F_{31}=0.39$ ,  $p=0.53$ ). This indicates that the hepatic mitochondria of redder birds appear  
344 to have lower costs associated with supporting basal respiratory than duller birds. Further, red  
345 birds also had increased mitochondrial membrane potential with complex I in both regression  
346 models and less leak (state 2 respiration) in the backward regression model and a near significant  
347 trend in the full model (table 1). These findings are also consistent with higher coupling  
348 efficiency associated with red coloration and supports the prediction that red birds have better  
349 mitochondrial function than drab birds.



350 We found a strong negative association between PGC-1 $\alpha$  and plumage redness (figure  
351 4B) that was consistent across the backward and full multiple regression models. PGC-1 $\alpha$  is  
352 thought to be the master regulator of mitochondrial biogenesis, but it has also been associated  
353 with mitochondrial remodeling [47]. While both red and dull birds maintained comparable  
354 mitochondrial density (as indicated by consistent citrate synthase activity), higher PGC-1 $\alpha$   
355 suggests that the mitochondria of dull birds require more frequent replacement. Redder males  
356 also had significantly higher 4-HNE levels indicating that they produce more oxidants than  
357 drabber males (table 1). A modest increase in oxidant levels has been shown to increase relative  
358 antioxidant levels, upregulate repair mechanisms, and upregulate mitochondrial biogenesis,  
359 while high levels of oxidant typically lead to persistent oxidative damage [31,48–51]. Despite the  
360 fact that 4-HNE and PGC-1 $\alpha$  had opposing relationships with hue, they had a positive linear  
361 relationship with each other (linear regression,  $F_{31}=5.77$ ,  $p=0.023$ ) indicating that greater  
362 oxidative damage stimulates greater mitochondrial biogenesis, which would compensate for  
363 damaged mitochondria or replace mitochondria lost to mitophagy and apoptosis. Whether higher  
364 4-HNE reflects a persistent detrimental response in these birds is unknown. Prior studies have  
365 suggested that in the short-lived house finch, redder birds have improved overwinter survival and  
366 improved ability to combat disease relative to dull birds [52,53].

367

368 **(c) An enzymatic model for how carotenoid coloration may be controlled by**  
369 **mitochondrial bioenergetics**

370 Collectively, our observations indicate that carotenoid coloration is strongly correlated  
371 with hepatic mitochondrial performance in the house finch. In turn, it is plausible that respiratory  
372 performance may control carotenoid ketolation through processes occurring in the IMM, where

373 3EH is localized. One way in which these processes may be linked is through the putative  
374 cytochrome P450 enzyme CYP2J19, which has been shown to genetically required for the  
375 production of red carotenoid pigments in birds and turtles [21,22,57]. Based on this genetic link  
376 we hypothesized that this protein is an enzyme that catalyzes ketolation of yellow dietary  
377 carotenoids to their red derivatives in a reaction requiring an electron donor (e.g. NAD(P)H) and  
378 oxygen [21] (figure 2). This requirement for reducing equivalents produced in the mitochondria  
379 for carotenoid conversion could serve as a link between mitochondrial function and  
380 pigmentation.

381         As an initial exploration of this hypothesis and to demonstrate the plausibility of a  
382 mechanistic link between the ketolation of carotenoid pigments and aerobic respiration in cells,  
383 we used an *in silico* approach to create a molecular model of CYP2J19 (figure 5A, movie S1).  
384 This model strongly suggests that, like many other cytochrome P450s, CYP2J19 possesses an N-  
385 terminal anchor tethering it to a cellular membrane (figure 5A). As carotenoids are lipophilic,  
386 this localization would position CYP2J19 ideally for performing the ketolation reaction. We  
387 identified a substrate binding channel in CYP2J19 leading to its heme cofactor (figure 5A,C).  
388 This tunnel emerges from the region of CYP2J19 predicted to be embedded in the lipid bilayer,  
389 based on analysis of membrane-associated cytochrome P450 enzymes [58,59]. It is lined by  
390 largely hydrophobic residues and is of dimensions compatible with carotenoid binding (figure  
391 5B,C). Each of these structural characteristics of CYP2J19 support the hypothesis that it  
392 catalyzes the conversion of yellow dietary carotenoids to red ketolated carotenoids in birds.

393         In turn, these characteristics of CYP2J19 support the hypothesis that its activity could  
394 directly link mitochondrial performance with carotenoid ketolation (figure 5D). Several  
395 scenarios are possible. At present, it is unknown whether or not CYP2J19 localizes within

396 mitochondria, but if CYP2J19 is anchored to the IMM, then its catalytic function would be  
397 affected by various aspects of mitochondrial performance; the enzyme would be particularly  
398 sensitive to mitochondrial redox state and would share an electron carrier with other key  
399 mitochondrial enzymes if it is NADH-dependent (i.e. complex I) or NADPH-dependent (e.g.  
400 thioredoxin or glutathione reductases) (figure 5D). Alternatively, yellow carotenoids may be  
401 oxidized by CYP2J19 in the ER before being imported into the IMM or, as suggested previously  
402 [25], may be modified due to respiratory activity or ROS production independently of CYP2J19.  
403 Future experiments should focus on determining the localization of CYP2J19, the biochemical  
404 role it plays in carotenoid ketolation, and how its activity responds to aerobic respiration.

405

#### 406 **4. Conclusions**

407 In this work, we demonstrate that (i) red carotenoids are localized in the inner  
408 mitochondrial membrane and (ii) plumage coloration is strongly correlated with mitochondrial  
409 function. Thus, we conclude that plumage coloration signals mitochondrial function, and hence  
410 core cellular functionality, in the house finch. Moreover, we propose the hypothesis that  
411 mitochondrial activity directly controls carotenoid ketolation. Detailed biochemical studies are  
412 needed to further test this latter hypothesis and it remains plausible that mitochondrial activity  
413 indirectly rather than directly controls carotenoid oxidation. The strength of the correlations  
414 between plumage coloration and mitochondrial function, the co-localization of the red  
415 carotenoids and the mitochondrial respiratory chain, and the molecular models predicting  
416 membrane localization and carotenoid compatibility of CYP2J19 all support a functional link  
417 between aerobic respiration in mitochondria and production of red ornamental coloration.

418            Linking ornamental feather coloration with mitochondrial function suggests a possible  
419 solution to a long-standing puzzle in evolutionary and behavioral biology: *what maintains the*  
420 *honesty of signals of individual condition?* [13]. Carotenoid coloration has been documented to  
421 signal a wide range of measures of individual performance, such as foraging ability, overwinter  
422 survival, immune system function, predator avoidance, and cognition [3,5]. In turn,  
423 mitochondrial function is a critical component of these same processes. Linking the  
424 ornamentation used in mate choice to function of core respiratory processes provides a novel  
425 mechanistic explanation for why carotenoid coloration relates to a range of aspects of individual  
426 performance and why females use plumage redness as a key criterion in choosing mates.

427

428

429

430

431

432

433

434

435

436

437 **Funding**

438 Lab work was supported by NSF grants IOS1453784 and OIA1736150 to W.R.H.. R.G. was  
439 supported by a Sir Henry Wellcome Postdoctoral Fellowship (106077/Z/14/Z) and C.G. was  
440 supported by an ARC DECRA Fellowship (DE170100310).

441 **Authors contributions**

442 G.E.H. contributed to conceptualization, visualization, supervision, writing, and editing. W.R.H.  
443 contributed to conceptualization, visualization, supervision, funding acquisition, writing, and  
444 editing. J.D.J. contributed to conceptualization and editing. Z.G., N.R.P., H.A.T., V.A.A., M.J.P.,  
445 N.M.J, and H.A.P. contributed to investigation and editing. R.G. and C.G. contributed to  
446 methodology, investigation, visualization, writing, and editing. A.N.K. contributed to  
447 methodology, supervision, writing, and editing. Y.Z. contributed to conceptualization,  
448 methodology, investigation, data curation, visualization, formal analysis, writing, and editing.

449 **Competing interests**

450 Authors have no competing interests.

451 **Data accessibility**

452 All data are available from the Dryad database (will be submitted after manuscript is accepted,  
453 accession number TBA).

454 **Acknowledgments**

455 Maxwell Williams and Jordan Marquez assisted with trapping and laboratory assays. Matthew  
456 Toomey and Joseph Corbo conducted carotenoid analysis of mitochondrial fractions. Ryan  
457 Weaver, Chloe Josefson, and Kyle Heine provide valuable discussion and feedback. Vincent  
458 Careau suggested how to present the results of the backward regression model.

459

460 **Figure 1.** Hatching year house finches undergoing a first pre-basic molt, similar to those used in  
461 this study. The bird on the left is similar in hue to the drabbest male included in this study while  
462 the bird on the right is similar in hue to the brightest male included.

463

464 **Figure 2.** A schematic summary of the hypothesized links between red feather coloration and  
465 mitochondrial function. To produce red feathers, house finches ingest the yellow carotenoid  
466 cryptoxanthin and oxidize it to the red pigment 3-hydroxyechinenone. We hypothesized that  
467 ketolation efficiency is linked to mitochondrial bioenergetics. By this hypothesis, birds with low  
468 mitochondrial function have limited ketolation capacity and produce yellow feathers. Birds with  
469 high mitochondrial function have improved ketolation capacity and produce red feathers.

470

471

472 **Figure 3.** Ketolated carotenoid content of mitochondrial fractions from the livers of molting  
473 house finches. **(A)** The concentration of the red carotenoid 3-hydroxyechinenone (3HE) in each  
474 of three fractions of mitochondria isolated from house finch livers. 3HE concentration is higher  
475 in the inner mitochondrial membrane (IMM) than the matrix or outer mitochondrial membrane  
476 (OMM). **(B)** The relative 3HE content of each fraction was also evident in the color of fractions.  
477 **(C)** The separation of the three mitochondrial fractions was verified by western blotting of citrate  
478 synthase (CS), a citric acid enzyme located primarily in the matrix that also binds to the IMM,  
479 cytochrome *c* oxidase (COX IV), a protein of the electron transport system in IMM, and  
480 carnitine palmitoyltransferase I (CPT1), an enzyme that is unique to the OMM. Different lower-  
481 case letters above the data indicate significant differences among treatment groups ( $p < 0.05$ ).

482 Standard deviation bars are given. Western blots from which protein concentrations were  
483 estimated are given.

484

485 **Figure 4.** The relationships between feather redness and mitochondrial energy capacity and  
486 biogenesis. The results of a backward stepwise regression analysis ( $F = 10.6$ ,  $df = 6,25$ ,  $p <$   
487  $0.001$ ,  $R^2=0.727$ ) suggest that redness was most strongly correlated with (A) respiratory control  
488 ratio ( $P < 0.001$ ) and (B) PGC-1 $\alpha$  protein levels ( $P < 0.001$ ). Results of the full model and  
489 backwards regression are given in table 1.

490

491 **Figure 5.** A possible molecular mechanism for the ketolation of carotenoids in the inner  
492 mitochondrial membrane. (A) A molecular model of the cytochrome P450 monooxygenase  
493 CYP2J19. Left: Cartoon ribbons colored from blue (N-terminal) to red (C-terminal), heme  
494 cofactor in black, and predicted N-terminal lipid anchor in blue. Right: Same model colored  
495 white with substrate tunnel shown as green spheres (right). (B) The length of the CYP2J19  
496 substrate binding tunnel (left) is comparable to that of the putative carotenoid substrate  
497 cryptoxanthin (right). (C) The predicted substrate tunnel in CYP2J19 is surrounded by  
498 predominantly hydrophobic amino acids sidechains. Side chains surrounding tunnel are shown as  
499 sticks with representative hydrophobic residues labelled. The predicted CYP2J19 substrate  
500 tunnel (left) corresponds to the position of large substrates in previously solved cytochrome P450  
501 structures (right). (D) A model for how the putative ketolation reaction performed by CYP2J19  
502 may link red coloration to respiratory performance.

503

504

505

Fig 1

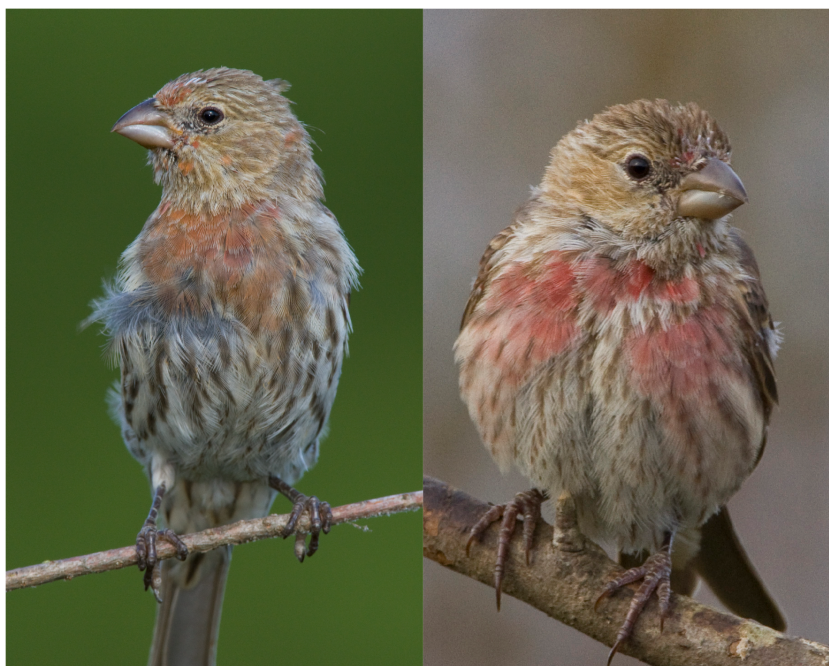

506

507



508 Fig 2

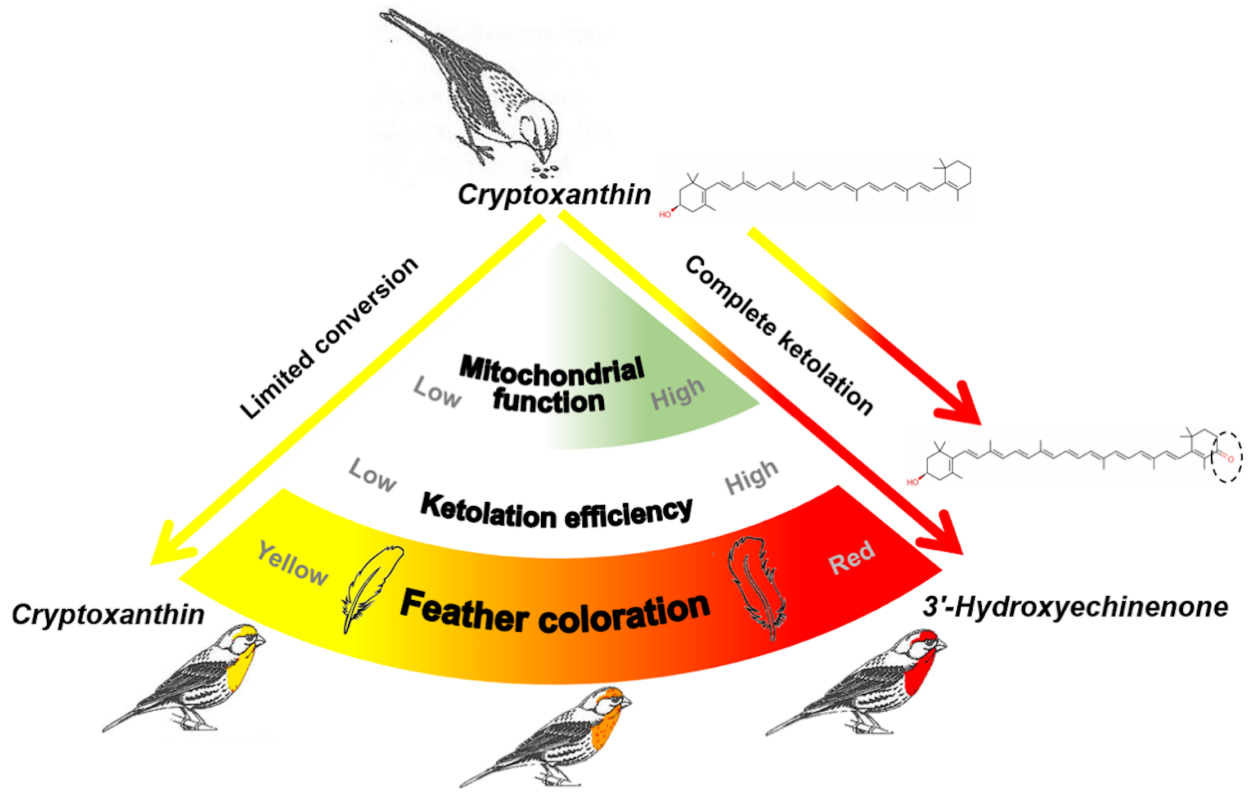

509

510

511

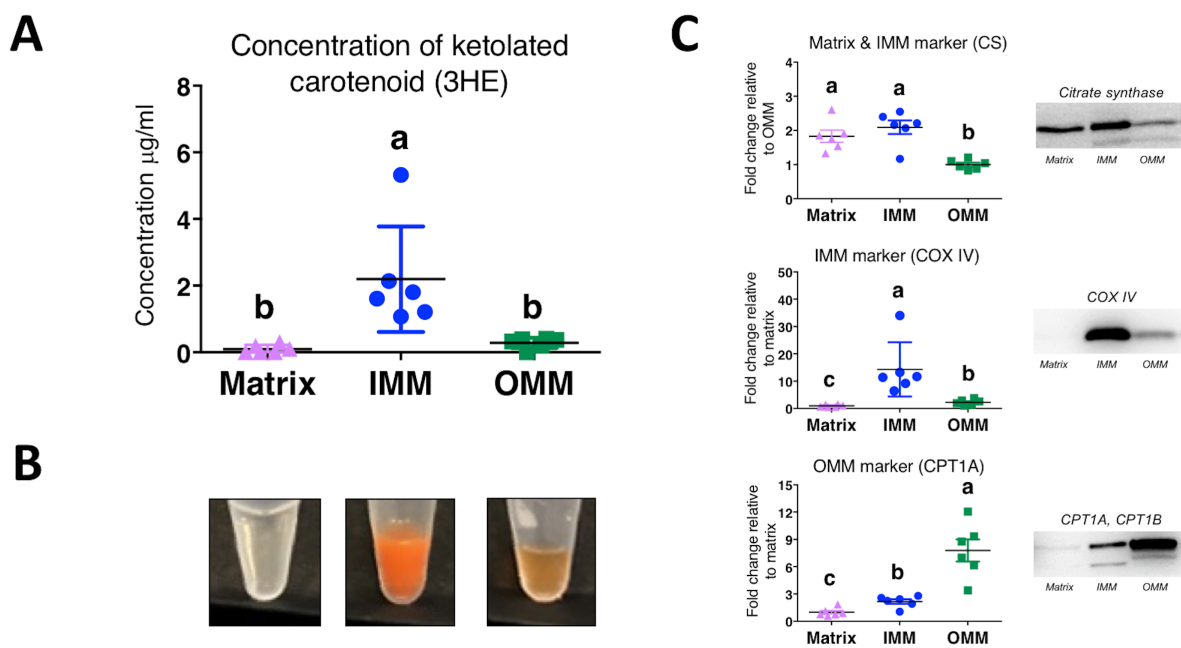

512  
513 Fig 3  
514  
515

516 Fig 4

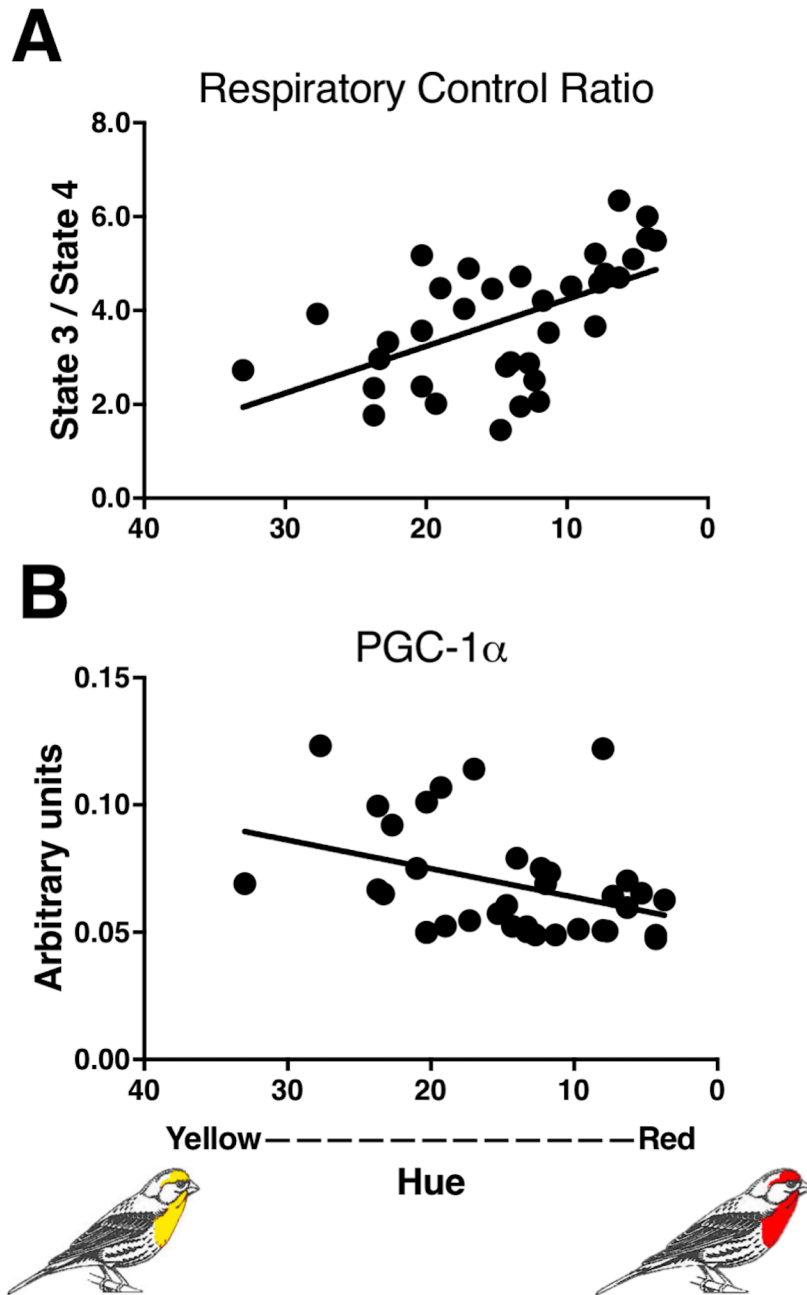

517

518 **Fig 5**

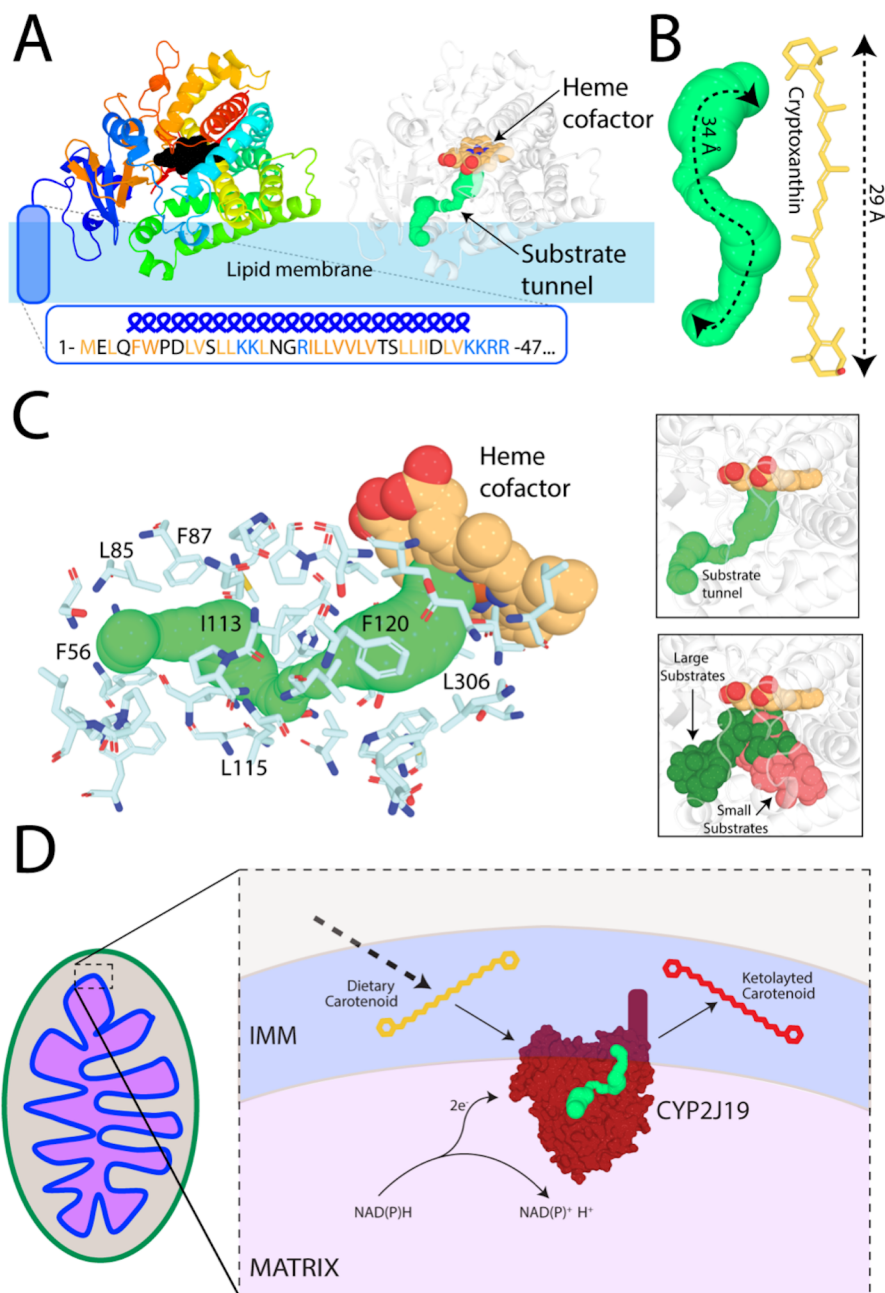

519  
520

521 **References**

- 522 1. Hill GE. 2007 Melanins and carotenoids as feather colorants and signals. In *Reproductive*  
523 *Biology and Phylogeny of Birds: Sexual Selection, Behavior, Conservation, Embryology*  
524 *and Genetics, Vol 6B.* (ed BGM Jamieson), pp. 41–74. Enfield, NH: Science Publishers.
- 525 2. Pryke SR, Andersson S, Lawes MJ, Piper SE. 2002 Carotenoid status signaling in captive  
526 and wild red-collared widowbirds: Independent effects of badge size and color. *Behav.*  
527 *Ecol.* **13**, 622–631. (doi:10.1093/beheco/13.5.622)
- 528 3. Svensson PA, Wong BBM. 2011 Carotenoid-based signals in behavioural ecology: a  
529 review. *Behaviour* **148**, 131–189. (doi:10.1163/000579510X548673)
- 530 4. Hill GE. 2006 Female mate choice for ornamental coloration. *Bird Color. Vol. II. Funct.*  
531 *Evol.* , 137–200.
- 532 5. Hill GE. 2006 Environmental Regulation of Ornamental Coloration. In *Bird Coloration:*  
533 *Vol. 1 Mechanisms and Measurements* (eds GE Hill, KJ McGraw), pp. 507–560.  
534 Cambridge MA: Harvard University Press.
- 535 6. Blount J, McGraw K. 2008 Signal functions of carotenoid colouration. In *Carotenoids*  
536 (eds S Liaaen-Jensen, H Pfander), pp. 213–236. Basel, Switzerland: Birkhäuser.  
537 (doi:10.1007/978-3-7643-7499-0)
- 538 7. Weaver RJ, Santos ESA, Tucker AM, Wilson AE, Hill GE. 2018 Carotenoid metabolism  
539 strengthens the link between feather coloration and individual quality. *Nat. Commun.* **9**,  
540 73. (doi:10.1038/s41467-017-02649-z)
- 541 8. McGraw KJ, Ardia DR. 2003 Carotenoids, immunocompetence, and the information  
542 content of sexual colors: an experimental test. *Am. Nat.* **162**, 704–712.
- 543 9. Hill GE. 2014 Cellular respiration: the nexus of stress, condition, and ornamentation.

- 544 *Integr. Comp. Biol.* **54**, 645–657. (doi:10.1093/icb/icu029)
- 545 10. Pike TW, Blount JD, Bjerkeng B, Lindström J, Metcalfe NB. 2007 Carotenoids, oxidative  
546 stress and female mating preference for longer lived males. *Proc. R. Soc. London B Biol.*  
547 *Sci.* **274**, 1591–1596.
- 548 11. Perez-Rodriguez L, Mougeot F, Alonso-Alvarez C. 2010 Carotenoid-based coloration  
549 predicts resistance to oxidative damage during immune challenge. *J. Exp. Biol.* **213**,  
550 1685–1690. (doi:10.1242/jeb.039982)
- 551 12. Koch RE, Hill GE. 2018 Do carotenoid-based ornaments entail resource tradeoffs? An  
552 evaluation of theory and data. *Funct. Ecol.* **32**, 1908–1920.  
553 (doi:<https://doi.org/10.1111/1365-2435.13122>)
- 554 13. Weaver RJ, Koch RE, Hill GE. 2017 What maintains signal honesty in animal colour  
555 displays used in mate choice? *Philos. Trans. R. Soc. B Biol. Sci.* **372**, 20160343.  
556 (doi:10.1098/rstb.2016.0343)
- 557 14. Garratt M, Brooks RC. 2012 Oxidative stress and condition-dependent sexual signals:  
558 more than just seeing red. *Proc. R. Soc. B Biol. Sci.* **279**, 3121–3130.  
559 (doi:10.1098/rspb.2012.0568)
- 560 15. Simons MJP, Cohen AA, Verhulst S. 2012 What does carotenoid-dependent coloration  
561 tell? Plasma carotenoid level signals immunocompetence and oxidative stress state in  
562 birds—a meta-analysis. *PLoS One* **7**, e43088. (doi:10.1371/journal.pone.0043088)
- 563 16. Alonso-Alvarez C, Pérez-Rodríguez L, Mateo R, Chastel O, Viñuela J. 2008 The  
564 oxidation handicap hypothesis and the carotenoid allocation trade-off. *J. Evol. Biol.* **21**,  
565 1789–1797. (doi:10.1111/j.1420-9101.2008.01591.x)
- 566 17. Møller AP, Biard C, Blount JD, Houston DC, Ninni P, Saino N, Surai PF. 2000

- 567 Carotenoid-dependent Signals: Indicators of Foraging Efficiency, Immunocompetence or  
568 Detoxification Ability? *Avian Poult. Biol. Rev.* **11**, 137–159.
- 569 18. Costantini D, Møller AP. 2008 Carotenoids are minor antioxidants for birds. *Funct. Ecol.*  
570 **22**, 367–370. (doi:10.1111/j.1365-2435.2007.01366.x)
- 571 19. Hill GE, Johnson JD. 2012 The vitamin A-redox hypothesis: a biochemical basis for  
572 honest signaling via carotenoid pigmentation. *Am. Nat.* **180**, E127--50.  
573 (doi:10.1086/667861)
- 574 20. McGraw KJ. 2006 Mechanics of carotenoid coloration. In *Bird Coloration, Volume 1:*  
575 *Measurements and Mechanisms* (eds GE Hill, KJ McGraw), pp. 177–242. Cambridge  
576 MA: Harvard University Press, Cambridge, Mass.
- 577 21. Lopes RJ *et al.* 2016 Genetic Basis for Red Coloration in Birds. *Curr. Biol.* **26**, 1427–  
578 1434. (doi:10.1016/j.cub.2016.03.076)
- 579 22. Mundy NII *et al.* 2016 Red Carotenoid Coloration in the Zebra Finch Is Controlled by a  
580 Cytochrome P450 Gene Cluster. *Curr. Biol.* **26**, 1435–1440.  
581 (doi:10.1016/j.cub.2016.04.047)
- 582 23. Twyman H, Andersson S, Mundy NI. 2018 Evolution of CYP2J19, a gene involved in  
583 colour vision and red coloration in birds: positive selection in the face of conservation and  
584 pleiotropy. *BMC Evol. Biol.* **18**, 22.
- 585 24. Inouye CY, Hill GE, Montgomerie R. 2012 Carotenoid pigments in male House Finch  
586 plumage in relation to age, subspecies, and ornamental coloration. *Auk* **118**, 900–915.  
587 (doi:10.2307/4089841)
- 588 25. Johnson JD, Hill GE. 2013 Is carotenoid ornamentation linked to the inner mitochondria  
589 membrane potential? A hypothesis for the maintenance of signal honesty. *Biochimie* **95**,

- 590 436–444. (doi:10.1016/j.biochi.2012.10.021)
- 591 26. Hill GE. 2002 *A red bird in a brown bag: the function and evolution of ornamental*  
592 *plumage coloration in the House Finch*. New York: Oxford University Press.
- 593 27. McKay BD. 2013 The use of digital photography in systematics. *Biol. J. Linn. Soc.* **110**,  
594 1–13.
- 595 28. Hill GE, Hood WR, Huggins K. 2009 A multifactorial test of the effects of carotenoid  
596 access, food intake and parasite load on the production of ornamental feathers and bill  
597 coloration in American goldfinches. *J. Exp. Biol.* **212**, 1225–1233.  
598 (doi:10.1242/jeb.026963)
- 599 29. Trounce IA, Kim YL, Jun AS, Wallace DC. 1996 Assessment of mitochondrial oxidative  
600 phosphorylation in patient muscle biopsies, lymphoblasts, and transmittochondrial cell  
601 lines. *Methods Enzymol.* **264**, 484–509. (doi:10.1016/S0076-6879(96)64044-0)
- 602 30. Palczewski G, Amengual J, Hoppel CL, Von Lintig J. 2014 Evidence for  
603 compartmentalization of mammalian carotenoid metabolism. *FASEB J.* **28**, 4457–4469.  
604 (doi:10.1096/fj.14-252411)
- 605 31. Zhang Y, Humes F, Almond G, Kavazis A, Hood WR. 2017 A mitohormetic response to  
606 pro-oxidant exposure in the house mouse. *Am. J. Physiol. Integr. Comp. Physiol.* **314**,  
607 R122–R134. (doi:10.1152/ajpregu.00176.2017)
- 608 32. Lambert AJ, Buckingham JA, Boysen HM, Brand MD. 2008 Diphenyleneiodonium  
609 acutely inhibits reactive oxygen species production by mitochondrial complex I during  
610 reverse, but not forward electron transport. *Biochim. Biophys. Acta - Bioenerg.* **1777**, 397–  
611 403. (doi:10.1016/j.bbabi.2008.03.005)
- 612 33. Åkerman KEO, Wikström MKF. 1976 Safranin as a probe of the mitochondrial



- 613 membrane potential. *FEBS Lett.* **68**, 191–197. (doi:10.1016/0014-5793(76)80434-6)
- 614 34. Miwa S, Treumann A, Bell A, Vistoli G, Nelson G, Hay S, Von Zglinicki T. 2016  
615 Carboxylesterase converts Amplex red to resorufin: Implications for mitochondrial  
616 H<sub>2</sub>O<sub>2</sub> release assays. *Free Radic. Biol. Med.* **90**, 173–183.  
617 (doi:10.1016/j.freeradbiomed.2015.11.011)
- 618 35. R Core Team. 2014 *R: A language and environment for statistical computing*. Vienna,  
619 Austria: Foundation for Statistical Computing.
- 620 36. Kim DE, Chivian D, Baker D. 2004 Protein structure prediction and analysis using the  
621 Robetta server. *Nucleic Acids Res.* **32**, W526–W531. (doi:10.1093/nar/gkh468)
- 622 37. Roy A, Kucukural A, Zhang Y. 2010 I-TASSER: A unified platform for automated  
623 protein structure and function prediction. *Nat. Protoc.* **5**, 725. (doi:10.1038/nprot.2010.5)
- 624 38. Chovancova E *et al.* 2012 CAVER 3.0: A Tool for the Analysis of Transport Pathways in  
625 Dynamic Protein Structures. *PLoS Comput. Biol.* **10**, e1002708.  
626 (doi:10.1371/journal.pcbi.1002708)
- 627 39. Ge Z, Johnson JD, Cobine PA, McGraw KJ, Garcia R, Hill GE. 2015 High concentrations  
628 of ketocarotenoids in hepatic mitochondria of *Haemorrhous mexicanus*. *Physiol. Biochem.*  
629 *Zool.* **88**, 444–450. (doi:10.1086/681992)
- 630 40. Amengual J, Lobo GP, Golczak M, Li HNM, Klimova T, Hoppel CL, Wyss A,  
631 Palczewski K, von Lintig J. 2011 A mitochondrial enzyme degrades carotenoids and  
632 protects against oxidative stress. *FASEB J.* **25**, 948–959. (doi:10.1096/fj.10-173906)
- 633 41. Lobo GP, Isken A, Hoff S, Babino D, von Lintig J. 2012 BCDO2 acts as a carotenoid  
634 scavenger and gatekeeper for the mitochondrial apoptotic pathway. *Development* **139**,  
635 2966–2977. (doi:10.1242/dev.079632)

- 636 42. Galván I, Garrido-Fernández J, Ríos J, Pérez-Gálvez A, Rodríguez-Herrera B, Negro JJ.  
637 2016 Tropical bat as mammalian model for skin carotenoid metabolism. *Proc. Natl. Acad.*  
638 *Sci.* **113**, 10932–10937. (doi:10.1073/pnas.1609724113)
- 639 43. Barja G. 1998 Mitochondrial free radical production and aging in mammals and birds.  
640 *Ann. N. Y. Acad. Sci.* **854**, 224–238. (doi:10.1111/j.1749-6632.1998.tb09905.x)
- 641 44. Barja G. 2013 Updating the Mitochondrial Free Radical Theory of Aging: An Integrated  
642 View, Key Aspects, and Confounding Concepts. *Antioxid. Redox Signal.* **19**, 1420–1445.  
643 (doi:10.1089/ars.2012.5148)
- 644 45. Porter C *et al.* 2015 Mitochondrial respiratory capacity and coupling control decline with  
645 age in human skeletal muscle. *Am. J. Physiol. - Endocrinol. Metab.* **309**, E224–E232.  
646 (doi:10.1152/ajpendo.00125.2015)
- 647 46. Cawthon D, McNew R, Beers KW, Bottje WG. 1999 Evidence of mitochondrial  
648 dysfunction in broilers with pulmonary hypertension syndrome (ascites): Effect of t-butyl  
649 hydroperoxide on hepatic mitochondrial function, glutathione, and related thiols. *Poult.*  
650 *Sci.* **78**, 114–124. (doi:10.1093/ps/78.1.114)
- 651 47. Austin S, St-Pierre J. 2012 PGC1 alpha and mitochondrial metabolism - emerging  
652 concepts and relevance in ageing and neurodegenerative disorders. *J. Cell Sci.* **125**, 4963–  
653 4971. (doi:10.1242/jcs.113662)
- 654 48. Dröge W. 2002 Free radicals in the physiological control of cell function. *Physiol. Rev.*  
655 **82**, 47–95. (doi:10.1152/physrev.00018.2001)
- 656 49. Ray PD, Huang B-W, Tsuji Y. 2012 Reactive oxygen species (ROS) homeostasis and  
657 redox regulation in cellular signaling. *Cell. Signal.* **24**, 981–990.  
658 (doi:10.1016/J.CELLSIG.2012.01.008)

- 659 50. Schieber M, Chandel NSS. 2014 ROS function in redox signaling and oxidative stress.  
660 *Curr. Biol.* **24**, R453–R462. (doi:10.1016/J.CUB.2014.03.034)
- 661 51. Hood WR, Zhang Y, Mowry A V, Hyatt HW, Kavazis AN. 2018 Life History Trade-offs  
662 within the Context of Mitochondrial Hormesis. *Integr. Comp. Biol.* **58**, 567–577.  
663 (doi:10.1093/icb/icy073)
- 664 52. Hill GE. 1991 Plumage coloration is a sexually selected indicator of male quality. *Nature*  
665 **350**, 337–339. (doi:10.1038/350337a0)
- 666 53. Hill GE, Farmer KL. 2005 Carotenoid-based plumage coloration predicts resistance to a  
667 novel parasite in the house finch. *Naturwissenschaften* **92**, 30–34. (doi:10.1007/s00114-  
668 004-0582-0)
- 669 54. Braun EJ, Sweazea KL. 2008 Glucose regulation in birds. *Comp. Biochem. Physiol. - B*  
670 *Biochem. Mol. Biol.* **151**, 1–9. (doi:10.1016/j.cbpb.2008.05.007)
- 671 55. Kuzmiak S, Glancy B, Sweazea KL, Willis WT. 2012 Mitochondrial function in sparrow  
672 pectoralis muscle. *J. Exp. Biol.* **215**, 2039–2050. (doi:10.1242/jeb.065094)
- 673 56. McWilliams SR, Guglielmo C, Pierce B, Klaassen M. 2004 Flying, fasting, and feeding in  
674 birds during migration: a nutritional and physiological ecology perspective. *J. Avian Biol.*  
675 **35**, 377–393.
- 676 57. Twyman H, Valenzuela N, Litterman R, Andersson S, Mundy NI, Mundy NI. 2016 Seeing  
677 red to being red : conserved genetic mechanism for red cone oil droplets and co-option for  
678 red coloration in birds and turtles. *Proc. R. Soc. London. Ser. B Biol. Sci.* **283**, 20161208.  
679 (doi:10.1098/rspb.2016.1208)
- 680 58. Šrejber M, Navrátilová V, Paloncýová M, Bazgier V, Berka K, Anzenbacher P, Otyepka  
681 M. 2018 Membrane-attached mammalian cytochromes P450: An overview of the

682 membrane's effects on structure, drug binding, and interactions with redox partners. *J.*  
683 *Inorg. Biochem.* **183**, 117–136. (doi:10.1016/j.jinorgbio.2018.03.002)  
684 59. Cojocaru V, Winn PJ, Wade RC. 2007 The ins and outs of cytochrome P450s. *Biochim.*  
685 *Biophys. Acta - Gen. Subj.* **1770**, 390–401. (doi:10.1016/j.bbagen.2006.07.005)  
686  
687
